# Supplementary material for: Macrophages Characterization in an Injured Bone Tissue
Source: MDPI journal article supplement (doi:10.3390/biomedicines10061385), 2022-06-11
Supplement: s1 [file s1]

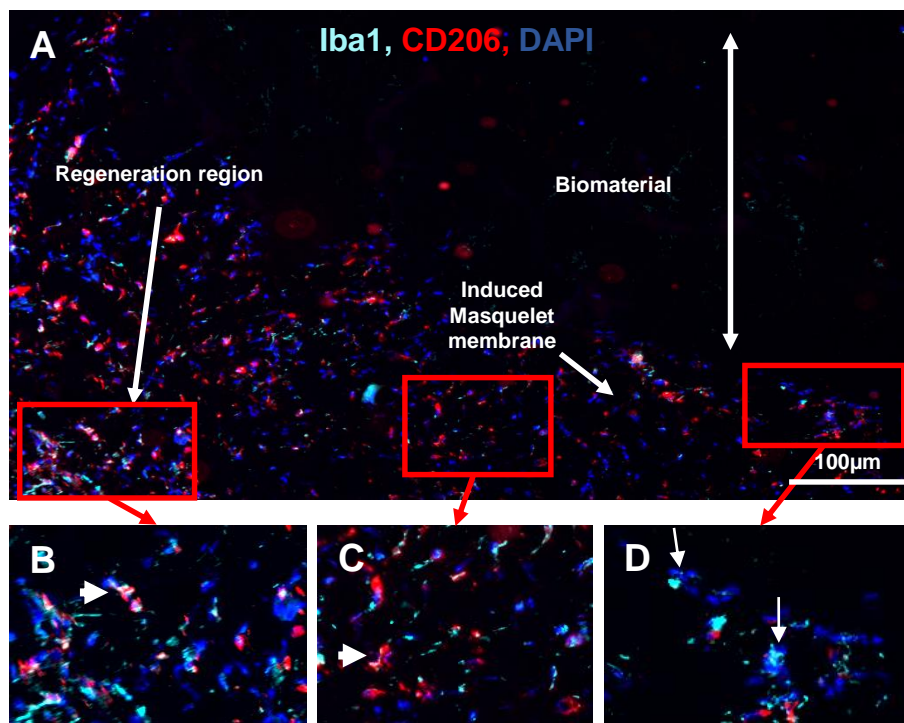

**Figure S1.** Identification of M1-like and M2-like macrophages in the rat femurs. **(A-D)** Immunolabeling with anti-Iba1 and CD206 antibodies of the operated femurs. **(B,C,D)** Expanded view: high magnification image of the area within the red rectangle in image A. Anti-Iba1 (Alexa488, turquoise fluorescence), labeling the M1 and M2 macrophages. Anti-CD206 (Alexa568, red fluorescence) labeling the M2 macrophages and satellite cells. Nuclear staining with DAPI (blue fluorescence). Thin arrow: M1-like macrophages; thick arrow: M2-like macrophages.

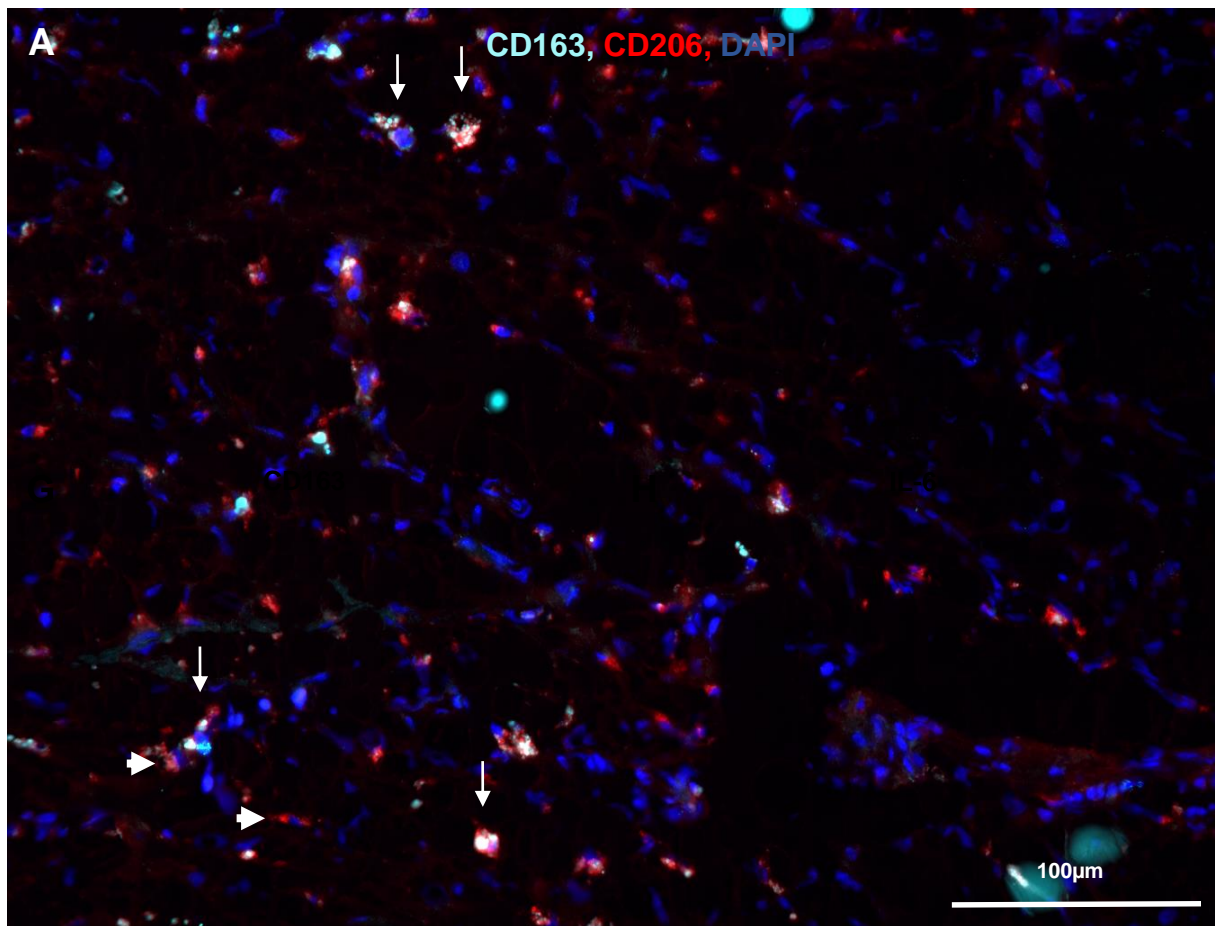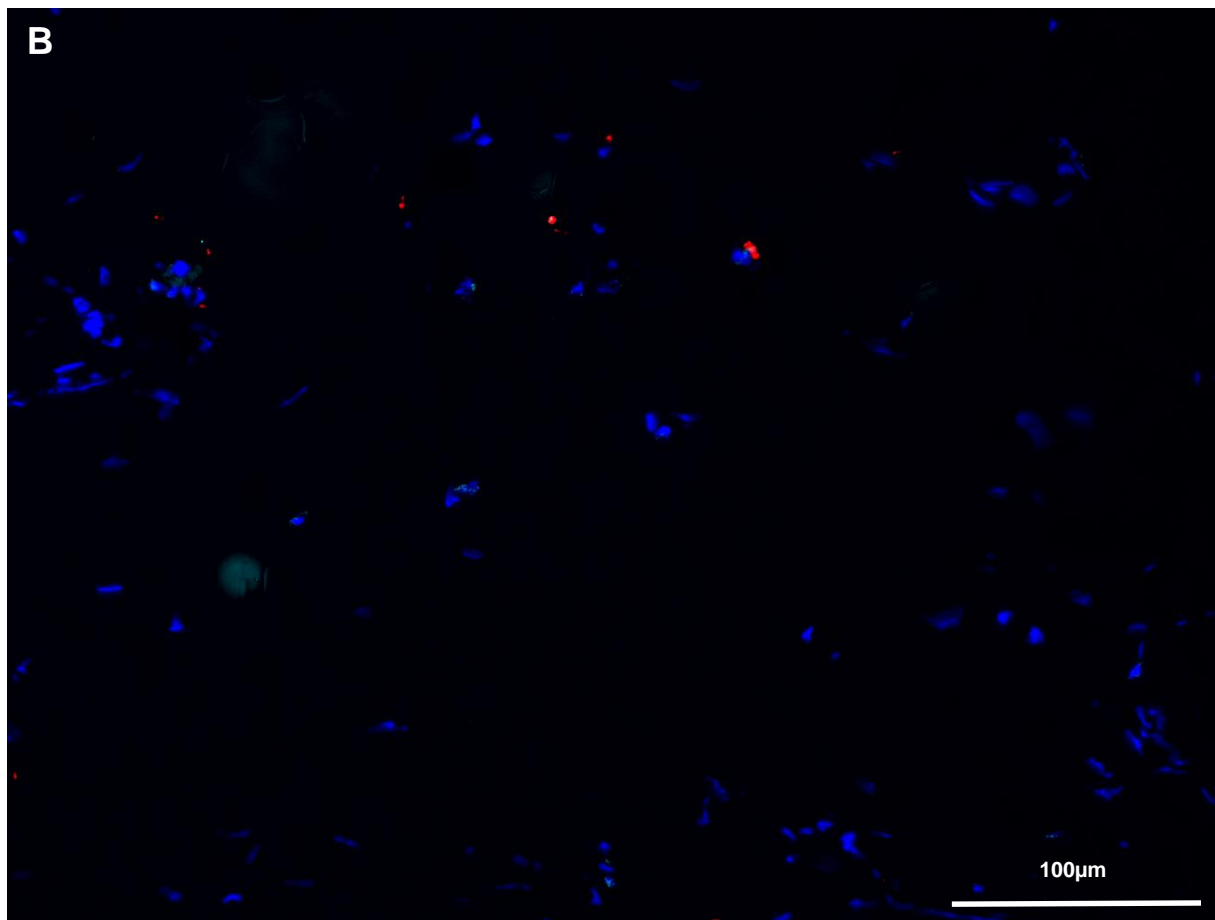

**Figure S2.** Identification of M2-like macrophages and satellite cells in the rat femurs. **(A)** Immunolabeling with anti-CD163 and CD206 antibodies of the operated femurs. **(B)** Negative control. Anti-CD163 (Alexa488, turquoise fluorescence), labeling the M2-like macrophages. Anti-CD206 (Alexa568, red fluorescence) labeling the M2-like macrophages and satellite cells. Nuclear staining with DAPI (blue fluorescence). Thin arrow: M2-like macrophages; thick arrow: satellite cells.

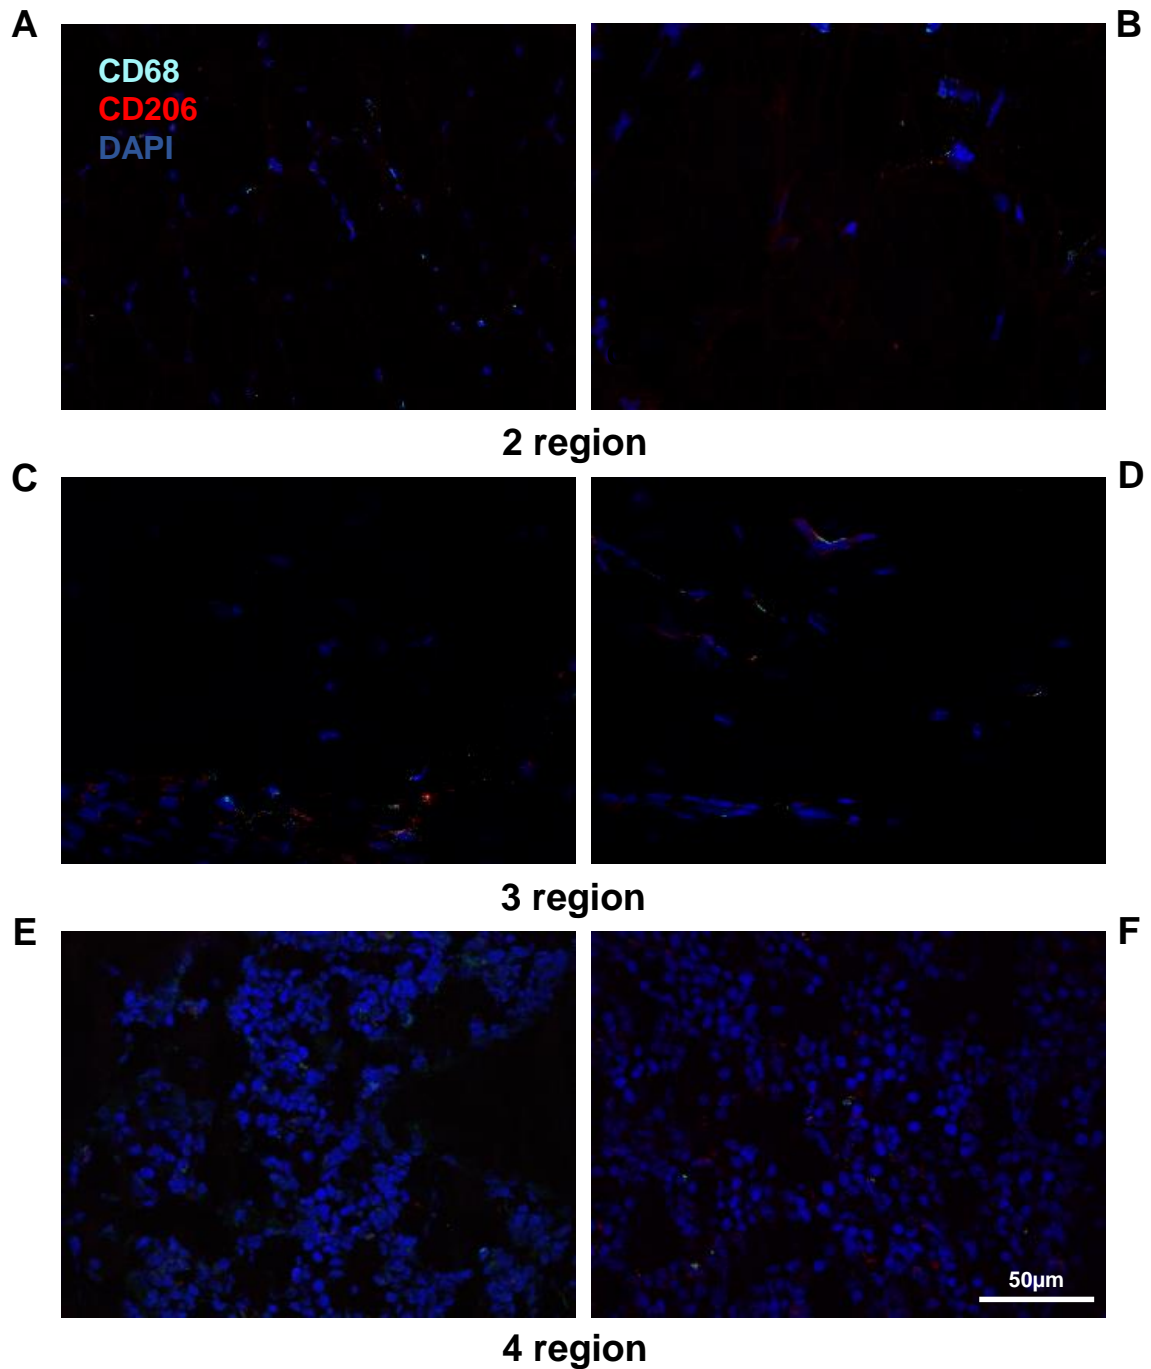

**Figure S3.** Identification of macrophages M1-like and M2-like in the femurs of the rat. (A) Negative control of Figure 4B; (B) Negative control of Figure 4C; (C) Negative control of Figure 4D; (D) Negative control of Figure 4E; (E) Negative control of Figure 4F; (F) Negative control of Figure 4G. Anti-CD68 (Alexa488, turquoise fluorescence) labeling the M1-like and M2-like macrophages. Anti-CD206 (Alexa568, red fluorescence) labeling the M2-like macrophages and satellite cells. Nuclear staining with DAPI (blue fluorescence).



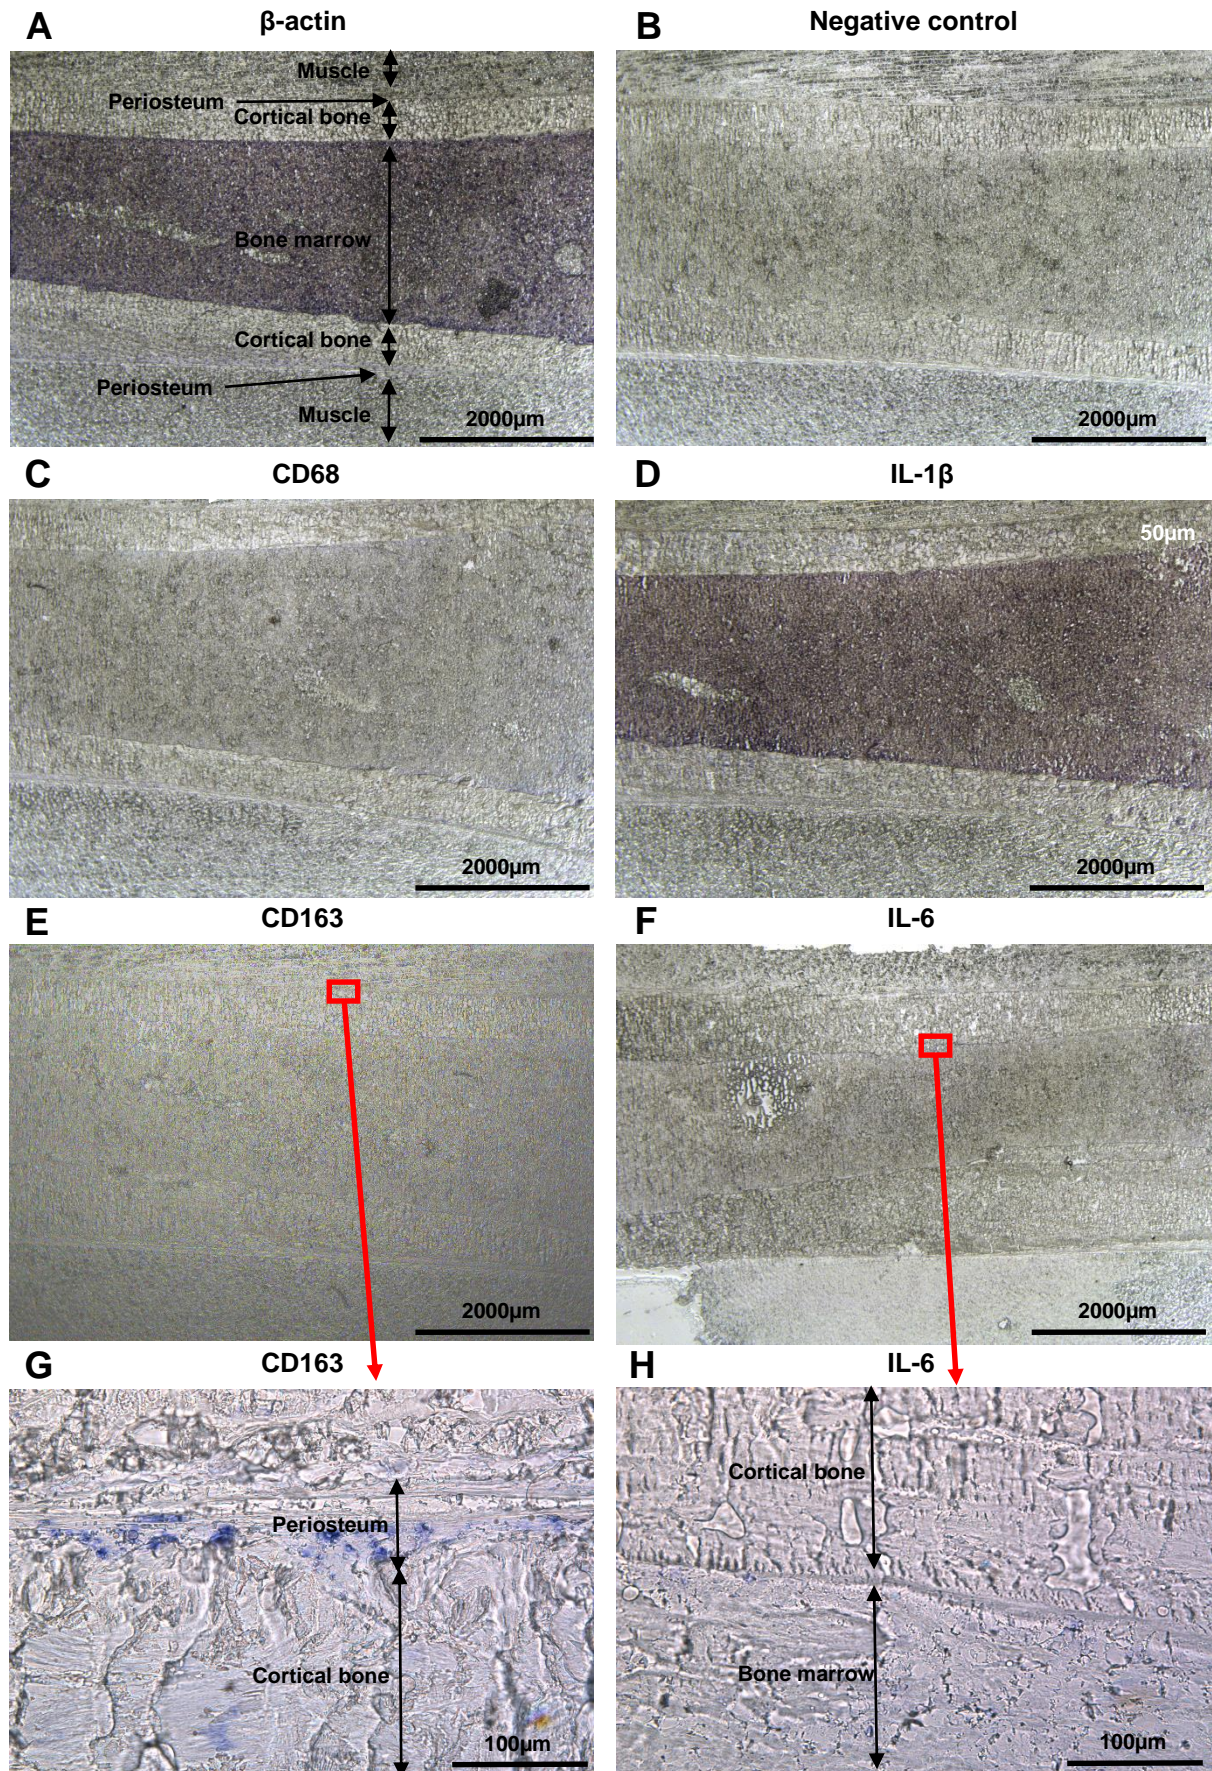

**Figure S4.** *In situ* hybridization in the non-operated femur of the rat. (A) Expression of  $\beta$ -actin mRNA (positive control); (B) negative control; (C) CD68 mRNA; (D) IL-1 $\beta$  mRNA; (E) CD163 mRNA; (F) IL-6 mRNA. (G) Expanded view: high magnification image of the area within the red rectangle in image E. (H) Expanded view: high magnification image of the area within the red rectangle in image F.



| Oligo name               | Gene accession number | Oligo sequence            |
|--------------------------|-----------------------|---------------------------|
| RT_Rat_CD68_FW           | XM_213372.3           | CAATTCACCTGGACCTGCTCTC    |
| RT_Rat_CD68_RV           | XM_213372.3           | AAGAGAAGCATGGCCCGAAG      |
| RT_Rat_CD163_FW          | XM_006237352.2        | CCTTCTCATTGCCTTCCTCTTGTTG |
| RT_Rat_CD163_RV          | XM_006237352.2        | TTCCGAGGATTCAGCAAGTC      |
| RT_Rat_CD206_FW          | NM_001106123          | TGGTCATCGTGGTCCTTCTGATTG  |
| RT_Rat_CD206_RV          | NM_001106123          | GATCTTTCGTGTCACTTGTTCCAG  |
| RT_Rat_actin_FW          | NM_031144.3           | CCTGGAGAAGAGCTATGAGCTG    |
| RT_Rat_actin_RV          | NM_031144.3           | CAGGATTCCATACCCAGGAAGG    |
| RT_Rib_prot_FW           | FQ_211152.1           | CTAAAATCTCCAGAGGTACCATTG  |
| RT_Rib_prot_RV           | FQ_211152.1           | TCCCACCTTGTCTCCAGTCTTTATC |
| RT_Rat_IL-1 $\beta$ _FW  | NM_031512.1           | TCTTTGAAGAAGAGCCCGTCC     |
| RT_Rat_IL-1 $\beta$ _RV  | NM_031512.1           | AGCTCATATGGGTCAGACAG      |
| RT_Rat_IL-6_FW           | NM_012589.1           | GAGGATACCAACCAACAGACC     |
| RT_Rat_IL-6_RV           | NM_012589.1           | AGTGCATCATCGCTGTTTCATACAA |
| RT_Rat_TNF_FW            | NM_012675.3           | CATCTTCTCAAAACTCGAGTGACAA |
| RT_Rat_TNF_RV            | NM_012675.3           | TGGGAGTAGATAAGGTACAGCCC   |
| RT_Rat_IL-RA_FW          | XM_006233636.3        | TCGGAATGTGTTCTTGGGCATC    |
| RT_Rat_IL-RA_RV          | XM_006233636.3        | TCGGAGCGGATGAAGGTAAAG     |
| RT_Rat_IL-4_FW           | NM_201270.1           | CTTACGGCAACAAGGAACACC     |
| RT_Rat_IL-4_RV           | NM_201270.1           | TGAGTTCAGACCGCTGACAC      |
| RT_Rat_IL-10_FW          | NM_012854.2           | GCAGTGGAGCAGGTGAAGAATG    |
| RT_Rat_IL-10_RV          | NM_012854.2           | TGAGTGTACGTAGGCTTCTATGC   |
| RT_Rat_TGF- $\beta$ 1_FW | NM_021578.2           | CCGCAACAACGCAATCTATGAC    |
| RT_Rat_TGF- $\beta$ 1_RV | NM_021578.2           | CGTGTGCTCCACAGTTGACTTG    |
| RT_Rat_TGF- $\beta$ 2_FW | XM_006250448.3        | GGCTTCACCACAAAGACAGGAAC   |
| RT_Rat_TGF- $\beta$ 2_RV | XM_006250448.3        | CCTCCAGCTCTTGGCTCTTATTTG  |
| RT_Rat_TGF- $\beta$ 3_FW | NM_013174.2           | AGGAGTGGACAACGAAGATGAC    |
| RT_Rat_TGF- $\beta$ 3_RV | NM_013174.2           | CAGTCGGTGTGGAGGAATCATC    |

**Table S1.** Oligos used for RT-qPCR. FW (forward primer), RV (reverse primer).

| Oligo name                             | Gene accession number | Oligo sequence                                                                                                                           |
|----------------------------------------|-----------------------|------------------------------------------------------------------------------------------------------------------------------------------|
| T3_promoter_primer                     |                       | GCTACTTGCTGAATTAACCCTCACTAAAGGGA                                                                                                         |
| T7_promoter_primer                     |                       | AGTCGAATGTAATACGACTCACTATAGGGC                                                                                                           |
| DIG_Rat_actin_FW_T3                    | NM_031144.3           | TGAATTAACCCTCACTAAAGGGACCATTGAACACGGCA TTGTC                                                                                             |
| DIG_Rat_actin_RV_T7                    | NM_031144.3           | TGTAATACGACTCACTATAGGGCAAACGCAGCTCAGTA ACAGTCC                                                                                           |
| DIG_Rat_CD68_FW_T3                     | XM_213372.3           | TGAATTAACCCTCACTAAAGGGATGACCTTGCTGGTACT GCTTGTAG                                                                                         |
| DIG_Rat_CD68_RV_T7                     | XM_213372.3           | TGTAATACGACTCACTATAGGGCTACAGAGTGGACTGG AGCAAATG                                                                                          |
| DIG_Rat_CD163_FW_T3                    | XM_006237352.2        | TGAATTAACCCTCACTAAAGGGATCTCTGAGGCTGACC AATGAAG                                                                                           |
| DIG_Rat_CD163_RV_T7                    | XM_006237352.2        | TGTAATACGACTCACTATAGGGCAGATGTAGCTGTGGTC ATCC                                                                                             |
| DIG_Rat_IL-1 $\beta$ _FW_T3            | NM_031512.1           | TGAATTAACCCTCACTAAAGGGAATGACCTGTTCTTTGA GGCTGAC                                                                                          |
| DIG_Rat_IL-1 $\beta$ _RV_T7            | NM_031512.1           | TGTAATACGACTCACTATAGGGCTCAATTCATCCCATAC ACACGGAC                                                                                         |
| DIG_Rat_IL-6_FW_T3                     | NM_012589.1           | TGAATTAACCCTCACTAAAGGGACACCAGGAACGAAAG TCAACTC                                                                                           |
| DIG_Rat_IL-6_RV_T7                     | NM_012589.1           | TGTAATACGACTCACTATAGGGCAGAAACCATCTGGCT AGGTAAGAG                                                                                         |
| HCR_rat_CD163_revcom_fragment1         | XM_006237352.2        | GAGGAGGGCAGCAAACGGGAAGAGTCTTCCTTTACGAT ATTGCGCAGCGACCACCTCCACCTACCAAGCGGAGTTG ACCACTTGCTATGCAATATAGCATTCTTTCTTGAGGAGG GCAGCAAACGGGAAGAG  |
| HCR_rat_CD163_revcom_fragment2         | XM_006237352.2        | GAGGAGGGCAGCAAACGGGAAGAGTCTTCCTTTACGAT ATTGTCAGCCTCAGAGACATGAACTCCGAGCAGACAAC ACCTGCATCTTCCTTATATAGCATTCTTTCTTGAGGAGG GCAGCAAACGGGAAGAG  |
| HCR_rat_CD163_revcom_fragment3         | XM_006237352.2        | GAGGAGGGCAGCAAACGGGAAGAGTCTTCCTTTACGAT ATTCTGTAGTCTTATTTTGTCTCACAGACAATCCAGGA CTCCTGGGAGGGGCATATAGCATTCTTTCTTGAGGAGGG CAGCAAACGGGAAGAG   |
| HCR_rat_CD163_revcom_fragment4         | XM_006237352.2        | GAGGAGGGCAGCAAACGGGAAGAGTCTTCCTTTACGAT ATTCAAAACCAGGAGTGCAGTGAGGGTTGAATGACCT GTGCCATGCTGTGATATATAGCATTCTTTCTTGAGGAGG GCAGCAAACGGGAAGAG   |
| HCR_rat_CD163_revcom_fragment5         | XM_006237352.2        | GAGGAGGGCAGCAAACGGGAAGAGTCTTCCTTTACGAT ATTCATTAATAATCATACGAATCATTGGAATTTCCGAGG ATTTCAAGCAAGTCCATATAGCATTCTTTCTTGAGGAGGG CAGCAAACGGGAAGAG |
| HCR_rat_IL-1 $\beta$ _revcom_fragment1 | NM_031512.1           | CCTCGTAAATCCTCATCAATCATCCAGTAAACCGCCAAA AAACCTCCTCACTGTCGAAAGCTGCTATTTACAGTTGAG TTCAGGGACAGTTGAAAAAAGCTCAGTCCATCCTCGT AAATCCTCATCAATCATC |
| HCR_rat_IL-1 $\beta$ _revcom_fragment2 | NM_031512.1           | CCTCGTAAATCCTCATCAATCATCCAGTAAACCGCCAAA AAATGGATGCTCTCATCTGGACAGCCCAAGTCAAGGGC TTGGAAGCAATCCTTAAAAAAGCTCAGTCCATCCTCGT AAATCCTCATCAATCATC |
| HCR_rat_IL-1 $\beta$ _revcom_fragment3 | NM_031512.1           | CCTCGTAAATCCTCATCAATCATCCAGTAAACCGCCAAA AAAGTCATCATCCCACGAGTCACAGAGGACGGGCTCTT CTTCAAAGATGAAGGAAAAAAGCTCAGTCCATCCTCG TAAATCCTCATCAATCATC |
| HCR_rat_IL-1 $\beta$ _revcom_fragment4 | NM_031512.1           | CCTCGTAAATCCTCATCAATCATCCAGTAAACCGCCAAA AAACCTGTACAAAGCTCATGGAGAATACCACTTGTTGG                                                           |

|                                    |             |                                                                                                                                                    |
|------------------------------------|-------------|----------------------------------------------------------------------------------------------------------------------------------------------------|
|                                    |             | CTTATGTTCTGTCCAAAAAAGCTCAGTCCATCCTCGT<br>AAATCCTCATCAATCATC                                                                                        |
| HCR_rat_IL-<br>1β_revcom_fragment5 | NM_031512.1 | CCTCGTAAATCCTCATCAATCATCCAGTAAACCGCCAAA<br>AAAGTATTGTTTGGGATCCACACTCTCCAGCTGCAGGGT<br>GGGTGTGCCGTCCTTAAAAAAGCTCAGTCCATCCTCGTA<br>AATCCTCATCAATCATC |
| HCR_rat_IL-<br>6_revcom_fragment1  | NM_012589.1 | CTCACTCCCAATCTCTATCTACCCTACAAATCCAATAAA<br>AAAGTCCCAAGAAGGCAACTGGCTGGAAGTCTCTTGCG<br>GAGAGAACTTCATATTTTCACTTCATATCACTCACTCC<br>CAATCTCTATCTACCC    |
| HCR_rat_IL-<br>6_revcom_fragment2  | NM_012589.1 | CTCACTCCCAATCTCTATCTACCCTACAAATCCAATAAA<br>AAAATTGCCATTGCACAACCTCTTTTCTCATTTCCAAGAT<br>CTCCCTGAGAACAATTTTCACTTCATATCACTCACTCCC<br>AATCTCTATCTACCC  |
| HCR_rat_IL-<br>6_revcom_fragment3  | NM_012589.1 | CTCACTCCCAATCTCTATCTACCCTACAAATCCAATAAA<br>AAGGAACTCCAGAAGACCAGAGCAGATTTTCAATAGGC<br>AAATTTCTGGTTAATTTTCACTTCATATCACTCACTCCC<br>AATCTCTATCTACCC    |
| HCR_rat_IL-<br>6_revcom_fragment4  | NM_012589.1 | CTCACTCCCAATCTCTATCTACCCTACAAATCCAATAAA<br>AATGGAAGTTGGGGTAGGAAGGACTATTTTATATGAGT<br>CTTTTATCTCTTGATTTTCACTTCATATCACTCACTCCC<br>AATCTCTATCTACCC    |
| HCR_rat_IL-<br>6_revcom_fragment5  | NM_012589.1 | CTCACTCCCAATCTCTATCTACCCTACAAATCCAATAAA<br>AAATGCTTAGGCATAGCACACTAGGTTTGCCGAGTAGA<br>CCTCATAGTGACCTATTTTCACTTCATATCACTCACTCCC<br>AATCTCTATCTACCC   |

**Table S2.** Oligos used for *in situ* hybridization experiments. T3 (T3 promoter), T7 (T7 promoter), FW (forward primer), RV (reverse primer).
